# Supplementary material for: Glial and stem cell expression of murine Fibroblast Growth Factor Receptor 1 in the embryonic and perinatal nervous system
Source: PeerJ journal article supplement (doi:10.7717/peerj.3519), 2017-06-29

Control

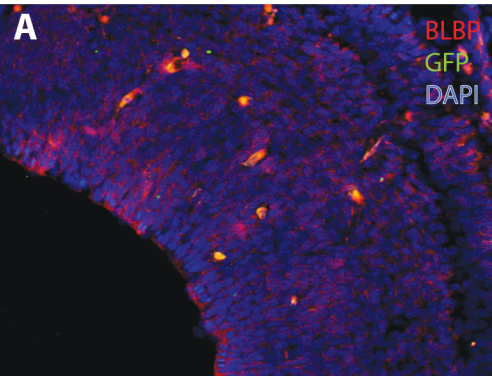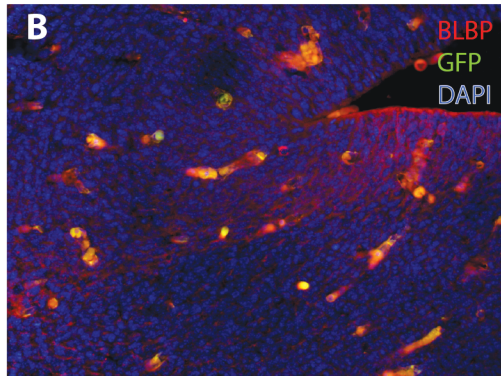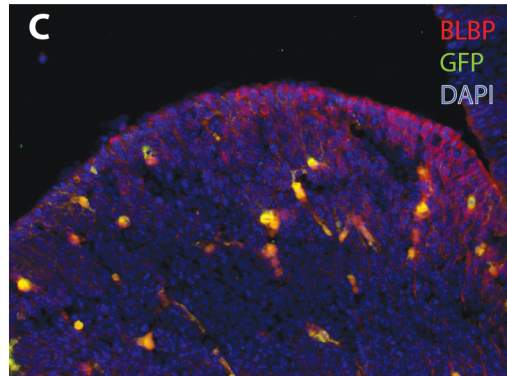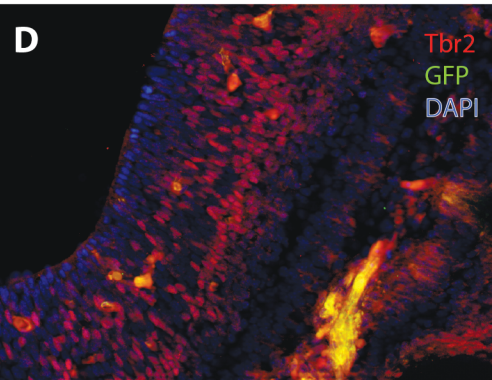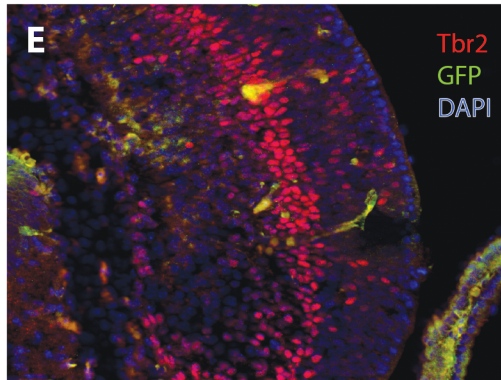

Supplement: Supplement_1.pdf [file Supplement_1.pdf]
