# Supplementary material for: Glial and stem cell expression of murine Fibroblast Growth Factor Receptor 1 in the embryonic and perinatal nervous system
Source: PeerJ journal article supplement (doi:10.7717/peerj.3519), 2017-06-29

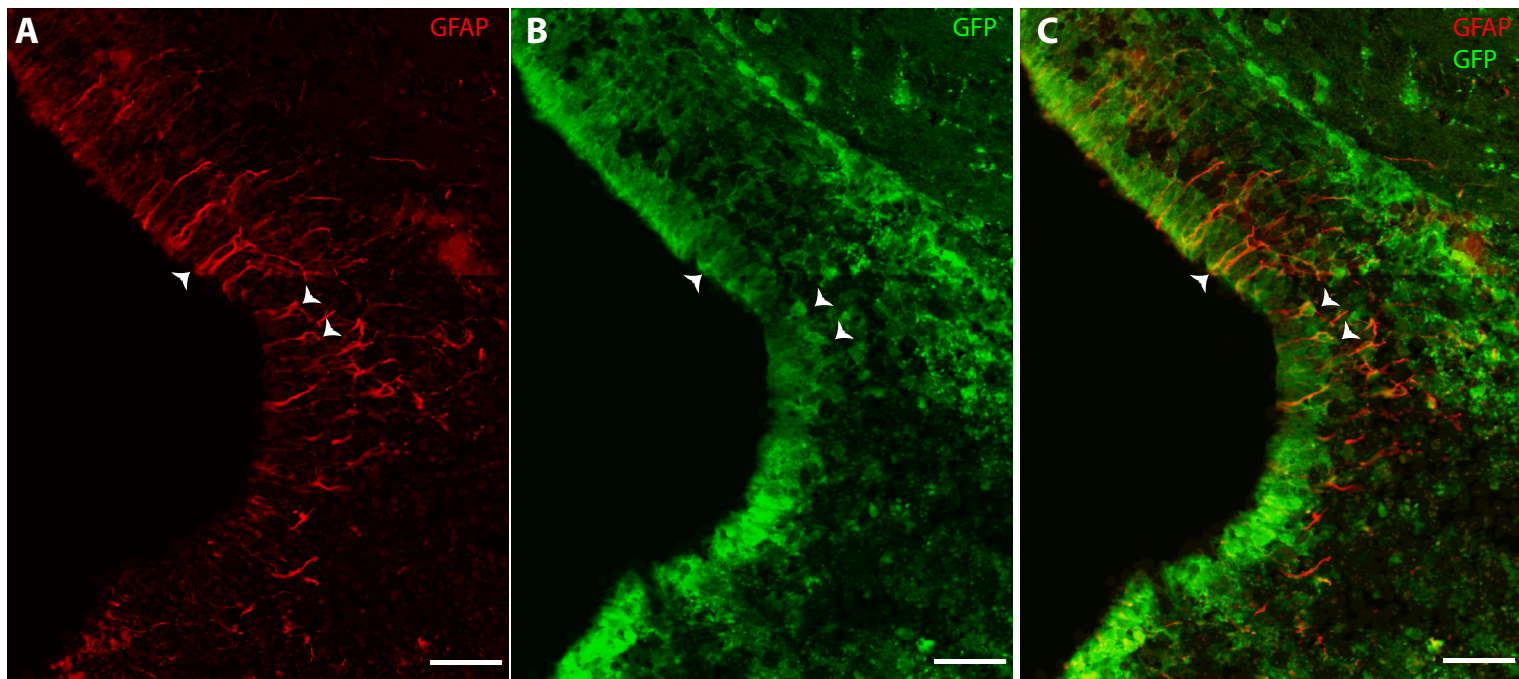

Supplement: Supplemental_Figure_2_v2.pdf [file Supplemental_Figure_2_v2.pdf]
